# Supplementary material for: Langmuir–Schaefer films of a set of achiral amphiphilic porphyrins: aggregation and supramolecular chirality
Source: Royal Society of Chemistry journal article supplement (doi:10.1039/b718146a), 2008-01-01
Supplement: b718146a.pdf [file b718146a.pdf]

## Supporting Information

### Langmuir-Schaefer films of a Set of Achiral Amphiphilic Porphyrins: Aggregation and Supramolecular Chirality

Tianyu Wang<sup>a</sup> and Minghua Liu<sup>\*a</sup>

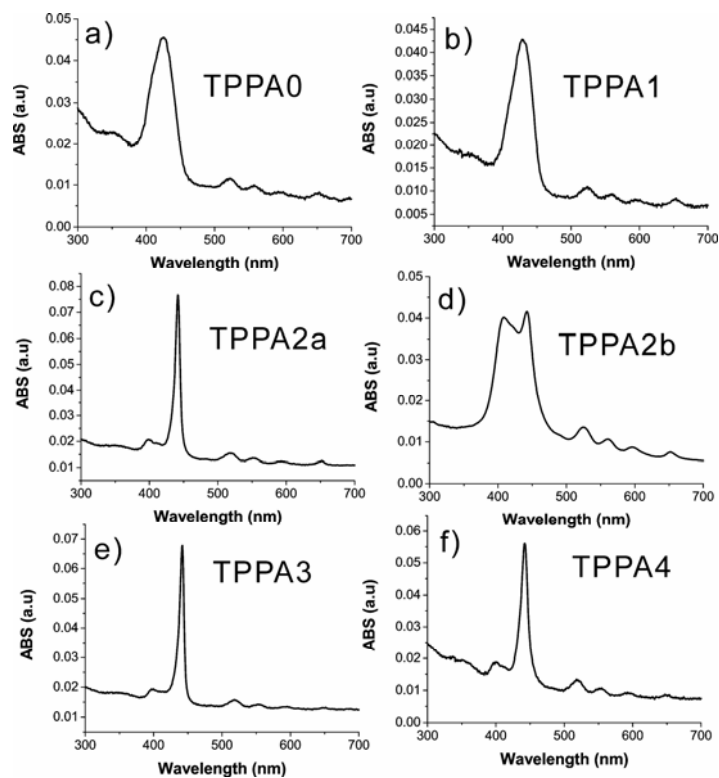

**Fig S1** UV-vis spectra obtained from one layer LS films. (a) **TPPA0**; (b) **TPPA1**; (c) **TPPA2a**; (d) **TPPA2b**; (e) **TPPA3**; (f) **TPPA4**.
